# Supplementary material for: Antibiotic Resistance and Genotypes of Mycoplasma genitalium during a Resistance-Guided Treatment Regime in a German University Hospital
Source: MDPI journal article supplement (doi:10.3390/antibiotics10080962), 2021-08-10
Supplement: s1 [file s1]

Communication

# Antibiotic Resistance and Genotypes of *Mycoplasma Genitalium* during a Resistance-Guided Treatment Regime in a German University Hospital

Roger Dumke <sup>1,\*</sup> and Petra Spornraft-Ragaller <sup>2</sup>

<sup>1</sup> Institut für Medizinische Mikrobiologie und Virologie, Universitätsklinikum, Technische Universität Dresden, Fetscherstrasse 74, 01307 Dresden, Germany

<sup>2</sup> Klinik und Poliklinik für Dermatologie, Universitätsklinikum, Technische Universität Dresden, Fetscherstrasse 74, 01307 Dresden, Germany; Petra.Spornraft-Ragaller@uniklinikum-dresden.de

\* Correspondence: roger.dumke@tu-dresden.de

**Table S1.** Designation of *M. genitalium* strains based on *mgpB* typing.

| Proposed Type Description | References    |
|---------------------------|---------------|
| 1–160                     | [1]           |
| 161–183                   | [2]           |
| 184–189                   | [3]           |
| 190–208                   | [4]           |
| 209–212                   | [5]           |
| 213–230                   | [6]           |
| 231–237                   | Present study |

**Table S2.** Sequences of new *mgpB* types.

Type 231 (patients #1, 42, 57)

ACTTGAAACAATAACAACCTTCTCTTCACTAAAGATTACTGGAGAGAACCCAGGATCATTT-  
 GGATTAGTAAGAAGCCAAAATGACAACCTTAAACATCGCAAGTGTTACAAAGAATGTTAGTGATGATAATCTCA  
 AGTATCTCAATACTGTTGAGAAATACCTTGATGGTCAGCAAAACCTT-  
 GCAATCAGAAGGTATGATAACAACGGTAGAGCTTTATATGATATTAACCTTAGCAAAAATGGAAAACCCCTCAA  
 CGG

Type 232 (patient #10)

ACTTGAAACAATAACAACCTTCTCTTCACTAAAGATTACTGGAGAGAACCCAGGATCATTT-  
GGATTAGTAAGAAGCCAAAATGACAACCTTAAATATTTCAAATGTTATTACAAAGAATAATGTTAGTGGTGATA  
ATCTCAAGTATCTCAATGATGTTGAGAAATACCTTGATGGTCAGCAAAACTTT-  
GCAATCAGAAGGTATGATAACAACGGTAGAGCTTTATATGATATTAACCTTAGCAAAAATGGAAAACCCCTCAA  
CGG

Type 233 (patients #18, 43)

ACTTGAAACAATAACAACCTTCTCTTCACTGAAGATTACTGGAGAGAACCCAGGATCATTT-  
GGACTAGTAAGAAGCCAAAATGAGAACTTAAACATCGCAAGTGTTACAAAGGATGGTAATGGTGATAATCTC  
AAGTATCTTAATGCTGTTGAGAAGTACCTTGATGGTCAGCAAAACTTT-  
GCAATCAGAAGGTATGATAACAACGGTAGAGCTTTATATGATATTAACCTTAGCAAAAATGGAAAACCCCTCAA  
CGG

Type 234 (patient #22)

ACTTGAAACAATAACAACCTTCTCTTCACTAAAGATTACTGGAGAGAACCCAGGATCATTT-  
GGATTAGTAAGAAGCCAAAATGACAACCTTAAACATCGCAAGTGTTACAAAGAATGTTAGTGATGATAATCTCA  
AGTATCTTAATTCTGTTGAGAAATACCTTGATGGTCAGCAAAACTTT-  
GCAATCAGAAGGTATGATAACAACGGTAGAGCTTTATATGATATTAACCTTAGCAAAAATGGAAAACCCCTCAA  
CGG

Type 235 (patient #31)

ACTTGAAACAATAACAACCTTCTCTTCACTGAAGATTACTGGAGAGAACCCAGGATCATTT-  
GGACTAGTAAGAAGCCAAAATGAGAACTTAAACATCGCAAGTGTTACAAAGAATAGTAGTGATGATAATCTC  
AAGTATCTTAATGCTGTTGAGAAGTACCTTGATGGTCAGCAAAACTTT-  
GCAATCAGAAGGTATGATAACAACGGTAGAGCTTTATATGATATTAACCTTAGCAAAAATGGAAAACCCCTCAA  
CGG

Type 236 (patient #35)

ACTTGAAACAATAACAACCTTCTCTTCACTAAAGATTACTGGAGAGAACCCAGGATCATTT-  
GGACTAGTAAGAAGCCAAAATGAGAACTTAAACATCGCAAGTGTTACAAAGAATGGTAGTGATGATAATCTC

AAGTATCTTAATGCTGTTGAGAAGTACCTTGATGGTCAGCAAAACTTT-  
 GCAATCAGAAGGTATGATAACAACGGTAGAGCTTTATATGATATTAAGTTAGCAAAAATGGAAAACCCCTCAA  
 CGG

Type 237 (patient #51)

ACTTGAAACAATAACAACCTTCTCTTCACTAAAGATTACTGGAGAAAACCCAGGATCATTT-  
 GGACTAGTAAGAAGCCAAAATGAGAACTTAAACATCGCAAGTGTTACAAAGAATGATAGTGATGATAATCTC  
 AAGTATCTTAATGCTGTTGAGAAATACCTTGATGGTCAGCAAAACTTT-  
 GCAATCAGAAGGTATGATAACAACGGTAGAGCTTTATATGATATTAAGTTAGCAAAAATGGAAAACCCCTCAA  
 CGG

## References

1. Dumke R, Rust M, Glaunsinger T. *MgpB* types among *Mycoplasma genitalium* strains from men who have sex with men in Berlin, Germany, 2016–2018. *Pathogens* **2019**, *20*, 9:12.
2. Guiraud J, Lounnas M, Boissière A, Le Roy C, Elguero E, Banuls AL, Bébéar C, Godreuil S, Pereyre S. Lower *mgpB* diversity in macrolide-resistant *Mycoplasma genitalium* infecting men visiting two sexually transmitted infection clinics in Montpellier, France. *J. Antimicrob. Chemother.* **2021**, *76*, 43–47.
3. Laumen JGE, van Alphen LB, Maduna LD, Hoffman CM, Klausner JD, Medina-Marino A, Kock MM, Peters RPH. Molecular epidemiological analysis of *Mycoplasma genitalium* shows low prevalence of azithromycin resistance and a well-established epidemic in South Africa. *Sex. Transm. Infect.* **2021**, *97*, 152–156.
4. Fernández-Huerta M, Serra-Pladevall J, Esperalba J, Moreno-Mingorance A, Fernández-Naval C, Barberá MJ, Aparicio D, Pich OQ, Pumarola T, Jensen JS, Espasa M. Single-locus-sequence-based typing of the *mgpB* gene reveals transmission dynamics in *Mycoplasma genitalium*. *J. Clin. Microbiol.* **2020**, *58*, e01886–19.
5. Plummer EL, Murray GL, Bodiyaadu K, Su J, Garland SM, Bradshaw CS, Read TRH, Tabrizi SN, Danielewski JA. A custom amplicon sequencing approach to detect resistance associated mutations and sequence types in *Mycoplasma genitalium*. *J. Microbiol. Methods* **2020**, *179*, 106089.
6. Sweeney EL, Tickner J, Bletchly C, Nimmo GR, Whitley DM. Genotyping of *Mycoplasma genitalium* suggests *de novo* acquisition of antimicrobial resistance in Queensland, Australia. *J. Clin. Microbiol.* **2020**, *58*, e00641–20.
